# Supplementary material for: A systematic review of newborn health interventions in humanitarian settings
Source: HighWire-hosted journal article supplement (doi:10.1136/bmjgh-2022-009082), 2022-07-01
Supplement: bmjgh-2022-009082supp001_data_supplement.pdf [file bmjgh-2022-009082supp001_data_supplement.pdf]

## Supplementary File 1: Search strategy for newborn health interventions in humanitarian crises settings

### → Protocol and tools available here:

[https://discover.lshtm.ac.uk/discovery/fulldisplay?docid=alma991000841542503736&context=L&vid=44HYG\\_INST:44HYG\\_VU1&lang=en&search\\_scope=MyInstitution&adaptor=Local%20Search%20Engine&tab=Everything&query=any,contains,msc%20public%20health%20of%20development&facet=rtype,include,mscproject&facet=searchcreationdate,include,2020%7C,%7C2020&offset=0](https://discover.lshtm.ac.uk/discovery/fulldisplay?docid=alma991000841542503736&context=L&vid=44HYG_INST:44HYG_VU1&lang=en&search_scope=MyInstitution&adaptor=Local%20Search%20Engine&tab=Everything&query=any,contains,msc%20public%20health%20of%20development&facet=rtype,include,mscproject&facet=searchcreationdate,include,2020%7C,%7C2020&offset=0)

### SEARCH STRATEGY

**Databases:** Medline, Embase, Global Health and PsycINFO

#### 1. LMICs Terms

296. Or/1-295 [ALL LOW AND MIDDLE-INCOME COUNTRIES] – Expert search for Medline and Embase
297. Developing Countries/
298. exp Asia/
299. exp Africa/
300. exp Europe, Eastern/
301. exp USSR/
302. exp Balkan Peninsula/
303. exp Caribbean region/
304. exp Central America/
305. exp Latin America/
306. exp South America/
307. exp Atlantic Islands/
308. exp Indian ocean islands/
309. Macau/
310. exp Pacific Islands/
311. Philippines/
312. Prince Edward Island/
313. Exp West Indies/
314. or/297-313
315. Japan/
316. 314 not 315 [Global Health and PsycInfo]

#### 2. Humanitarian setting terms

317. Humanitarian.mp.
318. (disaster adj3 (relief or plan\*)).mp.
319. ((relief or aid or rescue) adj2 work\*).mp.
320. (typhoon\* or hurricane\* or cyclone\*).mp.
321. (avalanche\* or earthquake\* or flood\* or landslide\* or tsunami\*).mp.
322. Hurricane/

- 323. Avalanche/
- 324. Earthquake/
- 325. Flooding/
- 326. Landslide/
- 327. Tsunami/
- 328. Drought\*.mp.
- 329. Drought/
- 330. exp natural disasters/
- 331. ((natural or victim) adj2 disaster).mp.
- 332. Disaster victims/
- 333. (starvation or famine\*).mp.
- 334. Famine/
- 335. Starvation/
- 336. exp disasters/
- 337. exp Emergency medicine/
- 338. Disaster medicine/
- 339. Medical Missions/
- 340. ((armed or zone) adj2 conflict\*).mp.
- 341. (conflict affected adj3 (population\* or person\* or communit\*)).mp.
- 342. War\*.mp.
- 343. exp Warfare/
- 344. exp Armed Conflicts/
- 345. exp war/
- 346. (refugee\* or evacuee or evacuated).mp.
- 347. ((force\* or population or human or internal\*) adj2 displace\*).mp.
- 348. (internally displaced adj2 (person or people)).mp.
- 349. Refugees/
- 350. Refugee Camps/
- 351. or/317-350

### 3. Newborn terms

- 352. (Newborn\* or new-born\*).ti,ab.
- 353. Neonate\*.ti,ab.
- 354. Infant\*.ti,ab.
- 355. Infancy.ti,ab.
- 356. Baby.ti,ab.
- 357. Babies.ti,ab.
- 358. exp Infant/
- 359. or/ 352-358

### 4. Interventions

- 360. "Minimum Initial Service Package".ti,ab.
- 361. exp Perinatal care/
- 362. (antenat\* or ante-nat\* or prenatal\*).ti,ab.
- 363. Prenatal care/
- 364. (Postnat\* or post-nat\*).ti,ab.

365. Postnatal care/
366. ("Emergency newborn care" or "emergency new-born care" or "emergency neonat\*").ti,ab.
367. (emnc or bemnc or cemnc).ti,ab.
368. ((Basic or comprehensive) ADJ2 (Emergency newborn care)).ti,ab.
369. ((neonatal or newborn or new-born) ADJ2 resuscitation).ti,ab.
370. ((neonatal or newborn or new-born or infant or baby) ADJ2 (health or care)).ti,ab.
371. Exp newborn care/
372. "Helping babies breath".ti,ab.
373. Childbirth\*.ti,ab.
374. Birth/
375. Parturition/
376. (clean ADJ2 (deliver\* or birth\*)).ti,ab.
377. Delivery, Obstetric/
378. Skilled birth attend\*.ti,ab.
379. ((Newborn or new-born ) adj2 (danger sign\*)).ti,ab.
380. "Essential newborn care".ti,ab.
381. (umbilical cord adj3 (care or hygiene)).ti,ab
382. (delay\* adj2 cord clamping).ti,ab.
383. Thermal care.ti,ab.
384. Vitamin K Deficiency Bleeding.ti,ab.
385. Vitamin K Deficiency Bleeding/
386. ((Newborn or new-born or neonatal) ADJ2 infection\*).ti,ab.
387. (Prematur\* or preterm).ti,ab.
388. ("Low birth weight" or LBW).ti,ab.
389. Exp low birth weight/
390. (Small ADJ2 (baby or babies)).ti,ab.
391. skin-to-skin contact.ti,ab.
392. ("Kangaroo mother care" or KMC).ti,ab.
393. Kangaroo-Mother Care Method/
394. Breastfeed\*.ti,ab.
395. Breast Feeding/
396. Infant health/
397. exp Infant Care
398. exp Infant, Newborn, diseases/
399. or/ 360-398
  
400. 296 and 351 and 359 and 399
401. Limit 400 to yr =1990-2021 (In Embase and Medline)
402. 316 and 351 and 359 and 399
403. Limit 402 to yr=1990-2021 (In Global Health and PsycINFO)
